# Supplementary material for: Selecting patients with non-ST-elevation acute coronary syndrome for coronary angiography: a nationwide clinical vignette study in the Netherlands
Source: PubMed Central journal article supplement — BMJ Open. 2017 Jan 19;7(1):e011213. doi: 10.1136/bmjopen-2016-011213 (PMC5253531; doi:10.1136/bmjopen-2016-011213), 2017-01-19
Supplement: bmjopen-2016-011213supp.pdf [file bmjopen-2016-011213supp.pdf]

**Appendix A – Summary of cardiologists’ response in terms of numbers and percentages of vignettes**

| Factors                                 | Vignette Response, N (%)                          |                     |                                                   |                     |
|-----------------------------------------|---------------------------------------------------|---------------------|---------------------------------------------------|---------------------|
|                                         | Group 1<br>Cardiologists n=57<br>Vignettes n=456≈ |                     | Group 2<br>Cardiologists n=54<br>Vignettes n=432≈ |                     |
|                                         | CA yes<br>242(53.1%)                              | CA no<br>214(46.9%) | CA yes<br>251(58.1%)                              | CA no<br>181(41.9%) |
| Troponin†                               |                                                   |                     |                                                   |                     |
| significant rise and/or ‘rise and fall’ | 179 (74.0%)                                       | 43 (20.1%)          | 174 (69.3%)                                       | 31 (17.1%)          |
| ECG                                     |                                                   |                     |                                                   |                     |
| Normal                                  | 65 (26.9%)                                        | 87 (40.7%)          | 65 (25.9%)                                        | 75 (41.4%)          |
| Atypical changes                        | 68 (28.1%)                                        | 90 (42.1%)          | 71 (28.3%)                                        | 73 (40.3%)          |
| Typical ischemic changes                | 109 (45.0%)                                       | 37 (17.3%)          | 115 (45.8%)                                       | 33 (18.2%)          |
| Age (years)                             |                                                   |                     |                                                   |                     |
| <70 years (in vignette 65 years)        | 77 (31.8%)                                        | 72 (33.6%)          | 71 (28.3%)                                        | 67 (37.0%)          |
| 70-80 years (in vignette 75 years)      | 102 (42.1%)                                       | 55 (25.7%)          | 107 (42.6%)                                       | 40 (22.1%)          |
| >80 years (in vignette 85 years)        | 63 (26.0%)                                        | 87 (40.7%)          | 73 (29.1%)                                        | 74(40.9%)           |
| Renal function                          |                                                   |                     |                                                   |                     |
| No renal dysfunction                    | 101 (41.7%)                                       | 52 (24.3%)          | 84 (33.5%)                                        | 59 (32.6%)          |
| Mild to moderate renal dysfunction      | 80 (33.1%)                                        | 68 (31.8%)          | 92 (36.7%)                                        | 51 (28.2%)          |
| Severe renal dysfunction                | 61 (25.2%)                                        | 94 (43.9%)          | 75 (29.9%)                                        | 71 (39.2%)          |
| Previous CAD                            |                                                   |                     |                                                   |                     |
| Yes                                     | 145 (59.9%)                                       | 91 (42.5%)          | 126 (50.2%)                                       | 94 (51.9%)          |
| Persistent chest pain                   |                                                   |                     |                                                   |                     |
| Yes                                     | 139 (57.4%)                                       | 81 (37.9%)          | 145 (57.8%)                                       | 67 (37.0%)          |
| Risk factors‡                           |                                                   |                     |                                                   |                     |
| No risk factors                         | 73 (30.2%)                                        | 74 (34.6%)          | 79 (31.5%)                                        | 62 (34.3%)          |
| One risk factor                         | 77 (31.8%)                                        | 74 (34.6%)          | 80 (31.9%)                                        | 55 (30.4%)          |
| More than one risk factor               | 92 (38.0%)                                        | 66 (30.8%)          | 92 (36.7%)                                        | 64 (35.4%)          |
| Risk score outcome∞                     |                                                   |                     |                                                   |                     |
| Low                                     | n.a.                                              |                     | 32 (12.7%)                                        | 66 (36.5%)          |
| Intermediate                            | n.a.                                              |                     | 163 (64.9%)                                       | 93 (51.4%)          |
| High                                    | n.a.                                              |                     | 56 (22.3%)                                        | 22 (12.2%)          |

† According to cardiologists' own hospital standards. ‡ i.e. diabetes mellitus, hypertension, hypercholesterolemia, smoking, and positive family history. ∞ Calculated risk according to risk score applied in cardiologist own practice (for instance GRACE or TIMI). ≈ Presented data concerns the number of vignettes in which cardiologists decided whether or not to perform a CA given a certain factor. For instance, for factor troponin: in vignettes where cardiologists decided to perform a CA in 74% troponin levels were elevated. Abbreviations: ca, coronary angiography; CAD, coronary artery disease; ECG, electrocardiogram; n.a., not applicable
